# Supplementary material
Source: publisher figshare collection journal article supplement (https://acs.figshare.com/ndownloader/files/4033681)
Supplement: Supplementary file 1 [file 4033681]

## Supporting Information

### Thiol Ligand-Induced Transformation of $\text{Au}_{38}(\text{SC}_2\text{H}_4\text{Ph})_{24}$ to $\text{Au}_{36}(\text{SPh-}t\text{-Bu})_{24}$

Chenjie Zeng,<sup>†</sup> Chunyan Liu,<sup>‡</sup> Yong Pei,<sup>‡</sup> and Rongchao Jin<sup>†,\*</sup>

<sup>†</sup>Department of Chemistry, Carnegie Mellon University, 4400 Fifth Ave, Pittsburgh, PA 15213, United States

<sup>‡</sup>Department of Chemistry, Key Laboratory of Environmentally Friendly Chemistry and Applications of Ministry of Education, Xiangtan University, Hunan Province 411105, People's Republic of China

A) Full range ESI-MS spectrum for the 5-min product:

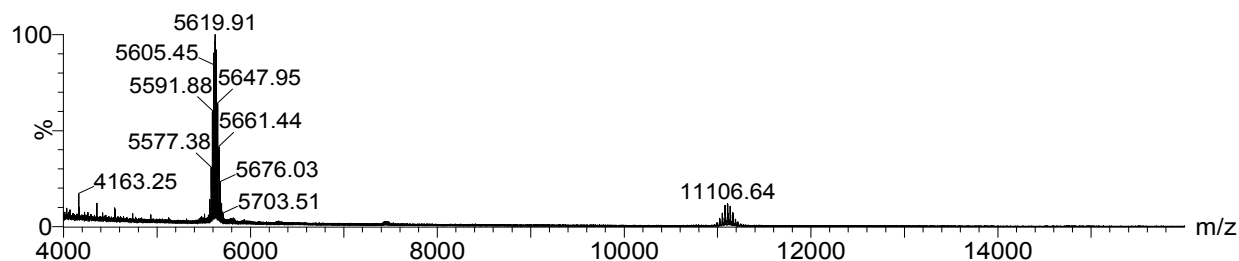

B) Full range ESI-MS spectrum for the 20-min product:

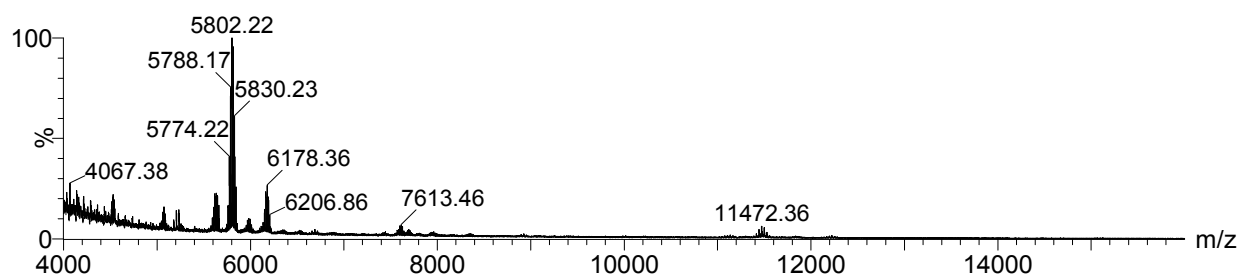

**Figure S1.** Full range ESI-MS spectra of the intermediate stages, A) initial ligand-exchange (5 min), B) disproportionation stage (e.g. 20 min). In the upper panel: The  $m/z$  5619.91 ion set corresponding to  $2+$  and  $m/z$  11106.64 to  $1+$  set. The peak assignment is provided in Table S1. For detail explanation, see main text.

**Table S1.** Identification of species in ESI-MS spectra at different reaction times. A) to C) corresponding to  $\text{Au}_{38}$ ,  $\text{Au}_{36}$  and  $\text{Au}_{40}$ , respectively.

A).

| $[\text{Au}_{38}(\text{TBBT})_x(\text{PET})_y\text{Cs}_2]^{2+}$ |    | $m/z$ Cal. | $m/z$ Experiment |         |        |        |        |        |       |
|-----------------------------------------------------------------|----|------------|------------------|---------|--------|--------|--------|--------|-------|
| x                                                               | y  |            | 0 min            | 5 min   | 10 min | 15 min | 20 min | 35 min | 60min |
| 0                                                               | 24 | 5521.68    | 5521.77          |         |        |        |        |        |       |
| 1                                                               | 23 | 5535.71    |                  |         |        |        |        |        |       |
| 2                                                               | 22 | 5549.74    |                  | 5549.68 |        |        |        |        |       |
| 3                                                               | 21 | 5563.77    |                  | 5563.85 |        |        |        |        |       |
| 4                                                               | 20 | 5577.8     |                  | 5577.46 |        |        |        |        |       |
| 5                                                               | 19 | 5591.83    |                  | 5591.80 |        |        |        |        |       |

|    |    |         |  |         |         |         |         |         |         |
|----|----|---------|--|---------|---------|---------|---------|---------|---------|
| 6  | 18 | 5605.86 |  | 5605.91 | 5605.78 |         |         |         |         |
| 7  | 17 | 5619.89 |  | 5619.94 | 5619.94 |         |         |         |         |
| 8  | 16 | 5633.92 |  | 5633.97 | 5633.92 |         |         |         |         |
| 9  | 15 | 5647.95 |  | 5648.00 | 5647.95 |         |         |         |         |
| 10 | 14 | 5661.98 |  | 5661.88 | 5661.99 |         |         |         |         |
| 11 | 13 | 5676.01 |  | 5675.94 | 5675.97 |         |         |         |         |
| 12 | 12 | 5690.04 |  | 5690.08 | 5689.97 | 5689.99 |         |         |         |
| 13 | 11 | 5704.07 |  | 5703.59 | 5703.98 | 5704.01 |         |         |         |
| 14 | 10 | 5718.10 |  |         | 5718.01 | 5718.01 |         |         |         |
| 15 | 9  | 5732.13 |  |         | 5732.03 | 5732.00 |         |         |         |
| 16 | 8  | 5746.16 |  |         | 5746.10 | 5746.04 |         |         |         |
| 17 | 7  | 5760.19 |  |         | 5760.18 | 5760.07 | 5760.26 |         |         |
| 18 | 6  | 5774.22 |  |         | 5774.03 | 5774.00 | 5774.25 | 5774.08 |         |
| 19 | 5  | 5788.25 |  |         | 5788.20 | 5788.17 | 5788.17 | 5788.14 |         |
| 20 | 4  | 5802.28 |  |         |         | 5802.2  | 5802.31 | 5802.14 | 5802.12 |
| 21 | 3  | 5816.31 |  |         |         | 5816.21 | 5816.26 | 5816.18 | 5816.58 |
| 22 | 2  | 5830.34 |  |         |         | 5829.81 | 5830.23 | 5830.26 | 5830.21 |
| 23 | 1  | 5844.37 |  |         |         |         | 5844.28 | 5844.25 | 5844.2  |
| 24 | 0  | 5858.40 |  |         |         |         |         | 5858.42 | 5858.23 |

**B).**

| [Au <sub>36</sub> (TBBT) <sub>x</sub> (PET) <sub>y</sub> Cs <sub>2</sub> ] <sup>2+</sup> |   | m/z cal. | m/z experiment |         |         |         |         |
|------------------------------------------------------------------------------------------|---|----------|----------------|---------|---------|---------|---------|
| x                                                                                        | y |          | 20 min         | 35 min  | 60 min  | 120 min | 240 min |
| 16                                                                                       | 8 | 5548.89  |                |         |         |         |         |
| 17                                                                                       | 7 | 5562.91  |                |         |         |         |         |
| 18                                                                                       | 6 | 5577.25  |                |         |         |         |         |
| 19                                                                                       | 5 | 5591.28  | 5591.25        | 5591.25 |         |         |         |
| 20                                                                                       | 4 | 5605.31  | 5605.31        | 5605.86 |         |         |         |
| 21                                                                                       | 3 | 5619.34  | 5619.30        | 5619.24 |         |         |         |
| 22                                                                                       | 2 | 5633.37  | 5633.34        | 5633.25 | 5633.38 | 5633.28 | 5633.20 |
| 23                                                                                       | 1 | 5647.40  | 5647.39        | 5647.28 | 5647.29 | 5647.28 | 5647.20 |
| 24                                                                                       | 0 | 5661.43  | 5661.35        | 5661.30 | 5661.28 | 5661.33 | 5661.24 |

**C).**

| [Au <sub>40</sub> (TBBT) <sub>x</sub> (PET) <sub>y</sub> Cs <sub>2</sub> ] <sup>2+</sup> |    | m/z cal. | m/z experiment |         |         |         |         |
|------------------------------------------------------------------------------------------|----|----------|----------------|---------|---------|---------|---------|
| x                                                                                        | y  |          | 20 min         | 35 min  | 60 min  | 120 min | 240 min |
| 16                                                                                       | 10 | 6080.32  |                |         |         |         |         |
| 17                                                                                       | 9  | 6094.35  |                |         |         |         |         |
| 18                                                                                       | 8  | 6108.38  |                |         |         |         |         |
| 19                                                                                       | 7  | 6122.41  |                |         |         |         |         |
| 20                                                                                       | 6  | 6136.44  | 6136.56        |         |         |         |         |
| 21                                                                                       | 5  | 6150.47  | 6150.31        |         |         |         |         |
| 22                                                                                       | 4  | 6164.50  | 6164.47        | 6164.15 |         |         |         |
| 23                                                                                       | 3  | 6178.53  | 6178.42        | 6178.62 | 6178.71 |         |         |
| 24                                                                                       | 2  | 6192.56  | 6192.82        | 6192.32 | 6192.74 | 6192.21 |         |
| 25                                                                                       | 1  | 6206.59  | 6206.86        | 6206.57 | 6206.6  | 6206.36 |         |
| 26                                                                                       | 0  | 6220.62  | 6220.74        | 6220.33 | 6220.63 | 6220.77 |         |

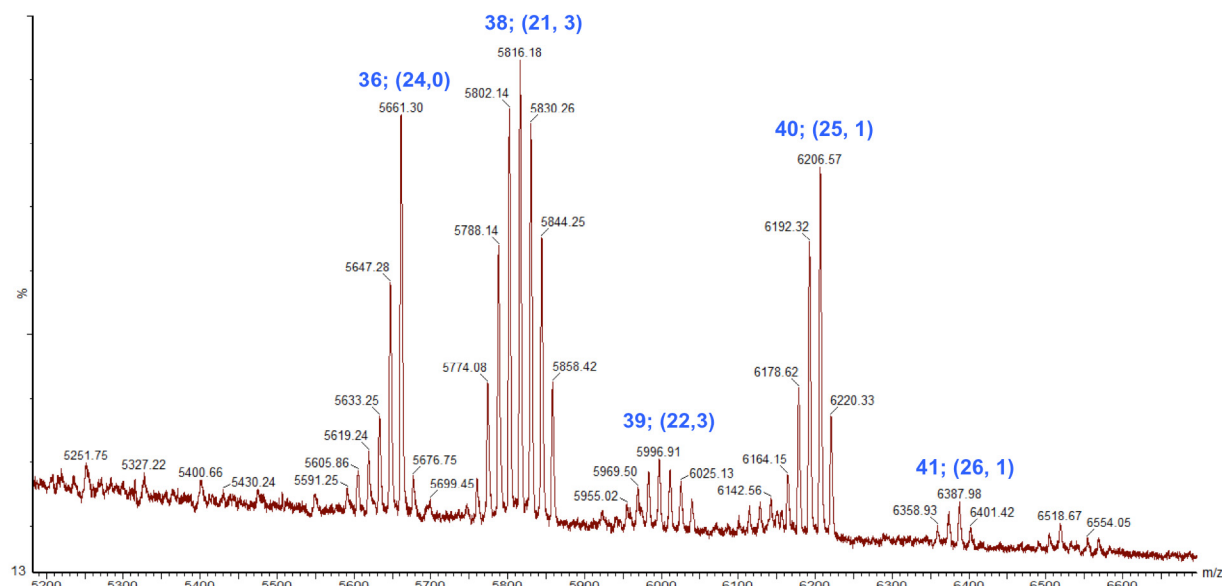

**Figure S2.** Zoom-in ESI-MS spectrum of the 35 min sample. Small amounts of  $\text{Au}_{39}(\text{SR})_{25}$  and  $\text{Au}_{41}(\text{SR})_{27}$  were observed together with the three intense sets of  $\text{Au}_{36}(\text{SR})_{24}$ ,  $\text{Au}_{38}(\text{SR})_{24}$  and  $\text{Au}_{40}(\text{SR})_{24}$ . The numbers of  $[n; (x, y)]$  on the top of peaks indicate  $\text{Au}_n(\text{TBBT})_x(\text{PET})_y$ .

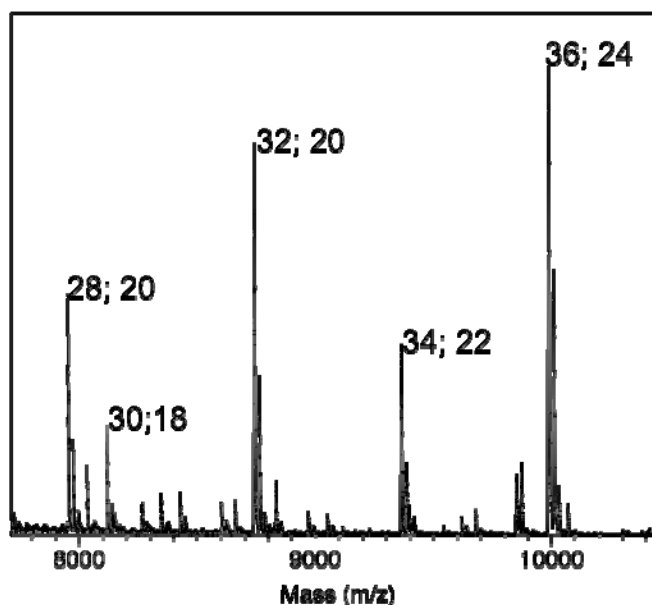

**Figure S3.** ESI-MS of the final product of  $\text{Au}_{38}$  reacting with cyclohexanethiol. A mixture of nanoclusters were observed (as opposed to clean  $\text{Au}_{36}(\text{TBBT})_{24}$  in the reaction with TBBT). The numbers in the form of  $(n; m)$  indicates  $\text{Au}_n(\text{SC}_6\text{H}_{11})_m$ .

**Kinetics for stage II and III.** In stage II, when more and more PET are exchanged by TBBT, the original rod-like Au<sub>38</sub> structure becomes a distorted structure (denoted as Au<sub>38</sub>\*). This process causes the significant increase in absorbance ( $A$ ) at 550 nm due to the difference in the extinction coefficient ( $\epsilon$ ) between Au<sub>38</sub> and Au<sub>38</sub>\* at this wavelength. For Au<sub>38</sub>,  $\epsilon_{Au_{38}}$  at 550 nm is measured to be 49,718 M<sup>-1</sup> cm<sup>-1</sup>, while for Au<sub>38</sub>\*,  $\epsilon_{Au_{38}^*}$  is calculated to be 67,580 M<sup>-1</sup> cm<sup>-1</sup> by assuming that at the maximum absorbance ( $A_{max}$  at 550 nm), all the Au<sub>38</sub> nanoclusters are converted to the Au<sub>38</sub>\* form (i.e.  $A_{max} = \epsilon_{Au_{38}^*} c_{Au_{38},0}$ ); hence, the concentration of Au<sub>38</sub> ( $c_{Au_{38}}$ ) at different time can be roughly determined by equ. (1) based on the change of absorbance ( $A$ ) at 550 nm ( $A = \epsilon_{Au_{38}} c_{Au_{38}} + \epsilon_{Au_{38}^*} c_{Au_{38}^*}$ ).

$$Au_{38} \xrightarrow[TBBT]{k_2} Au_{38}^*$$

$$c_{Au_{38}} = \frac{A - A_{max}}{\epsilon_{Au_{38}} - \epsilon_{Au_{38}^*}} \dots\dots\dots (1)$$

$$-dc_{Au_{38}} / dt = k_{2,obs} [c_{Au_{38}}]^n \dots\dots\dots (2)$$

Since the concentration of TBBT is around 4000 times higher than Au<sub>38</sub>, the rate law can be simplified as equation (2), where  $k_{2,obs}$  is the observed rate constant for stage II. In order to determine the reaction order, we measured the kinetic curves at different starting Au<sub>38</sub> concentrations while keeping other conditions the same (Figure S4). It was found that the time for the 550 nm peak to reach the maximum is independent of the starting Au<sub>38</sub> concentration, hence it is a first-order reaction (for first-order reactions,  $t_{1/2} = (\ln 2) / k$ , independent of  $c_{Au_{38}}$ ). Then we plotted  $\ln(c_{Au_{38}})$  against  $t$ , and a linear fitting was applied from  $t = 200$  to 600 s (Figure S5A). When  $t < 200$ s, the data exhibits fluctuations due to the turbulence when the solution was heated from R.T. to 80 °C, hence the initial data points are excluded from the fitting. When  $t > \sim 600$ s, the overlap between stage II and stage III also makes the data less independent and hence these data points are excluded from fitting. The obtained rate constant for stage II at 80 °C is  $k_{2,obs} = 3.5 \times 10^{-3} (s^{-1})$ . The  $k_{2,obs}$  at different temperatures are calculated in a similar way, and the results are summarized in Table 1 (main text).

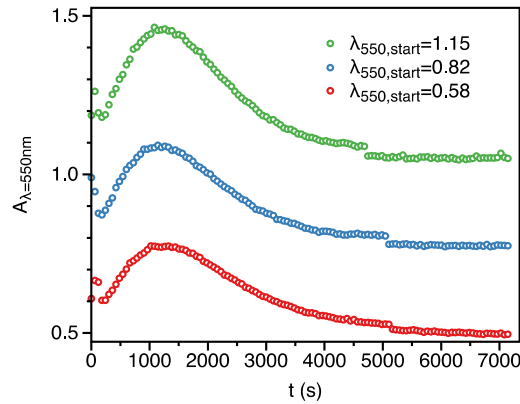

**Figure S4.** Kinetic curves for different starting concentrations of Au<sub>38</sub>. Reaction was done at 80 °C, with 10 µl TBBT in 1ml toluene.

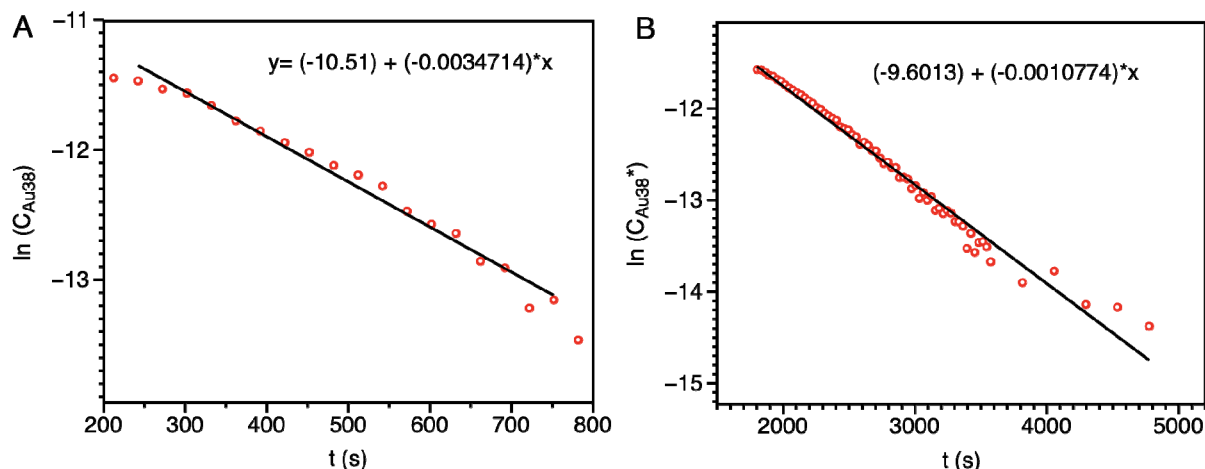

**Figure S5.** First-order fitting of the kinetic data for stage II (A) and stage III (B) at 80 °C.

A similar method was used to obtain the rate constant of stage III. In stage III, the absorbance at 550 nm is contributed by  $Au_{38}^*$ ,  $Au_{36}$  and  $Au_{40}$ . Several assumptions are made to obtain the concentration of  $Au_{38}^*$  at different time: (i) The starting point of stage III is set at the point when  $A_{\lambda 550}$  reaches the maximum, and the ending point is set at when the characteristic peak of  $Au_{38}^*$  at  $\sim 805$  nm disappears (Figure 1); (ii) At the starting point, all the absorbance is attributed to  $Au_{38}^*$ , while at the ending point the absorbance is contributed by  $Au_{36}$  and  $Au_{40}$ ; (iii) The concentrations of  $Au_{36}$  and  $Au_{40}$  are the same during stage III. Hence the mixed extinction coefficient,  $\epsilon_{36+40}$ , is calculated to be  $41,431 \text{ M}^{-1} \text{ cm}^{-1}$ . The concentration of  $Au_{38}^*$  at different times is then determined based on eq. (3). The first-order kinetic model is also used to obtain the rate constant of stage III. Figure S5B shows the linear fitting of  $\ln(c_{Au_{38}^*})$  vs  $t$ , and the rate constant is determined to be  $k_{3,obs} = 1.1 \times 10^{-3} (\text{s}^{-1})$ . The rate constants at other temperatures are similarly obtained and summarized in Table 1 (main text).

$$Au_{38}^* \xrightarrow[TBBT]{k_3} Au_{36} + Au_{40}$$

$$c_{Au_{38}^*} = \frac{A - A_{final}}{\epsilon_{Au_{38}^*} - \epsilon_{Au_{(36+40)}}} \dots \dots \dots (3)$$

$$-dc_{Au_{38}^*} / dt = k_{3,obs} [c_{Au_{38}^*}]^n \dots \dots \dots (4)$$

With the obtained rate constants at different temperatures (60, 70, and 80 °C), the activation energy ( $E_a$ ) is obtained by plotting  $\ln(k)$  against  $1/T$  (Figure S6). For stage II,  $E_{a,II}$  is  $\sim 107$  kJ/mol. For stage III,  $E_{a,III}$  is  $\sim 152$  kJ/mol.

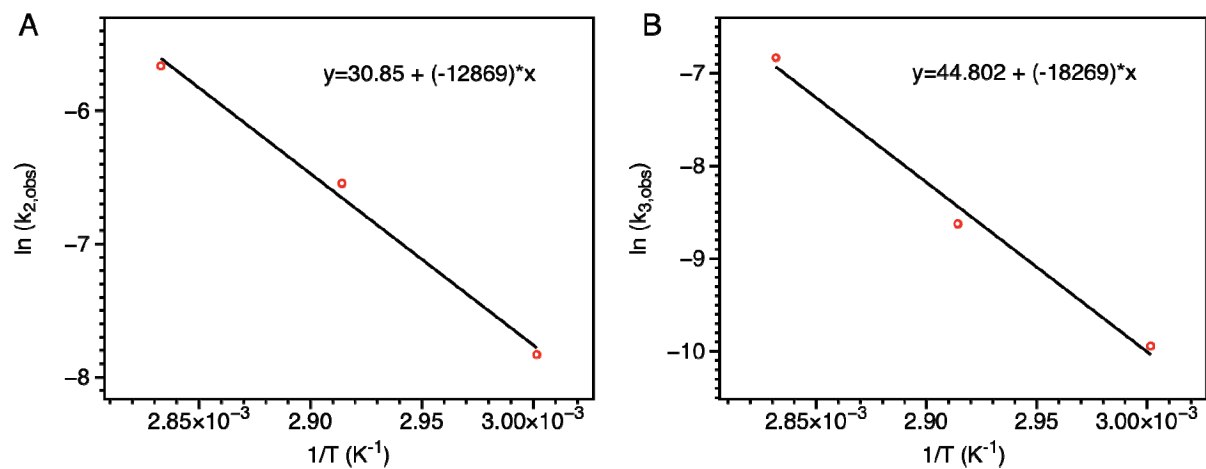

**Figure S6.** Determination of the activation energies for stage II (A) and III (B) by plotting  $\ln(k)$  vs.  $1/T$ .
